# Supplementary material for: The past century of coral bleaching in the Saudi Arabian central Red Sea
Source: PeerJ journal article supplement (doi:10.7717/peerj.10200), 2020-10-23
Supplement: Table_S1.pdf [file Table_S1.pdf]

Table S1. Coral core locations, depths, oldest counted bands, and any stress bands observed. All cores were collected from colonies of the genus *Porites*. Depth indicates the water depth of the top of each colony. The oldest band indicates the age of the bottom-most annual band of each core.

| ID  | Reef                       | Latitude<br>(°N) | Longitude<br>(°E) | Depth<br>(m) | Oldest<br>band | Stress bands                 |
|-----|----------------------------|------------------|-------------------|--------------|----------------|------------------------------|
| K01 | Abu Shosha                 | 22.30435         | 39.047            | 2            | 1964           | 1998, 2010                   |
| K02 | Abu Shosha                 | 22.30435         | 39.047            | 4            | 1986           | 2010                         |
| K03 | Rose Reef                  | 22.31032         | 38.88578          | 3            | 1996           | -                            |
| K04 | Shi'b Nazar                | 22.32012         | 38.85533          | 10           | 1968           | -                            |
| K05 | Shi'b Nazar                | 22.3288          | 38.85845          | 1            | 2000           | -                            |
| K06 | Cement Wreck               | 22.3916          | 38.85392          | 5            | 1934           | 1948, 1978                   |
| K07 | Cement Wreck               | 22.3916          | 38.85392          | 4            | 1967           | -                            |
| K08 | Piper's Pinnacle           | 22.39198         | 38.92038          | 11           | 1944           | -                            |
| K09 | Al Mtarbj                  | 22.4319          | 38.94892          | 3            | 1985           | 2010                         |
| K10 | Al Mtarbj                  | 22.4319          | 38.94892          | 2            | 1979           | -                            |
| K11 | Qita Al-Kirsh (Shark Reef) | 22.42813         | 38.9962           | 6            | 1994           | -                            |
| K12 | Qita Al-Kirsh (Shark Reef) | 22.42813         | 38.9962           | 6            | 2010           | -                            |
| K13 | Abu Shosha                 | 22.30414         | 39.04633          | 4            | 1917           | 1931, 1982, 1998, 2010, 2015 |
| K14 | Abu Shosha                 | 22.30414         | 39.04633          | 4            | 1934           | 1978, 1982, 1998             |
| K15 | Abu Shosha                 | 22.30414         | 39.04633          | 4            | 1968           | -                            |
| K16 | Abu Shosha                 | 22.30414         | 39.04633          | 4            | 1970           | 1998                         |
| K19 | Abu Shosha                 | 22.30487         | 39.04686          | 3            | 1966           | 1998, 2010                   |
| K20 | Abu Shosha                 | 22.30487         | 39.04686          | 2            | 1936           | 1998, 2010                   |
| K22 | Abu Shosha                 | 22.3056          | 39.04758          | 3            | 1970           | 1982, 1998, 2010             |
| K23 | Abu Shosha                 | 22.3056          | 39.04758          | 3.5          | 1930           | 2010                         |
| K24 | Abu Shosha                 | 22.3056          | 39.04758          | 3.5          | 1970           | 1998, 2010                   |
| K25 | Cement Wreck               | 22.3873          | 38.8548           | 11           | 1908           | -                            |
